# Supplementary material for: Metabolic pathways within cTfh subsets and glucose-dependent activation of cTfh17 in SLE and healthy individuals
Source: JCI journal article supplement (doi:10.1172/jci.insight.189858), 2025-07-21
Supplement: sd2 [file 2]

Uncropped/unedited blot image for Supplemental Figure 1A.  
The red rectangle indicate the region has been used for Supplemental Figure 1A.

GLUT1

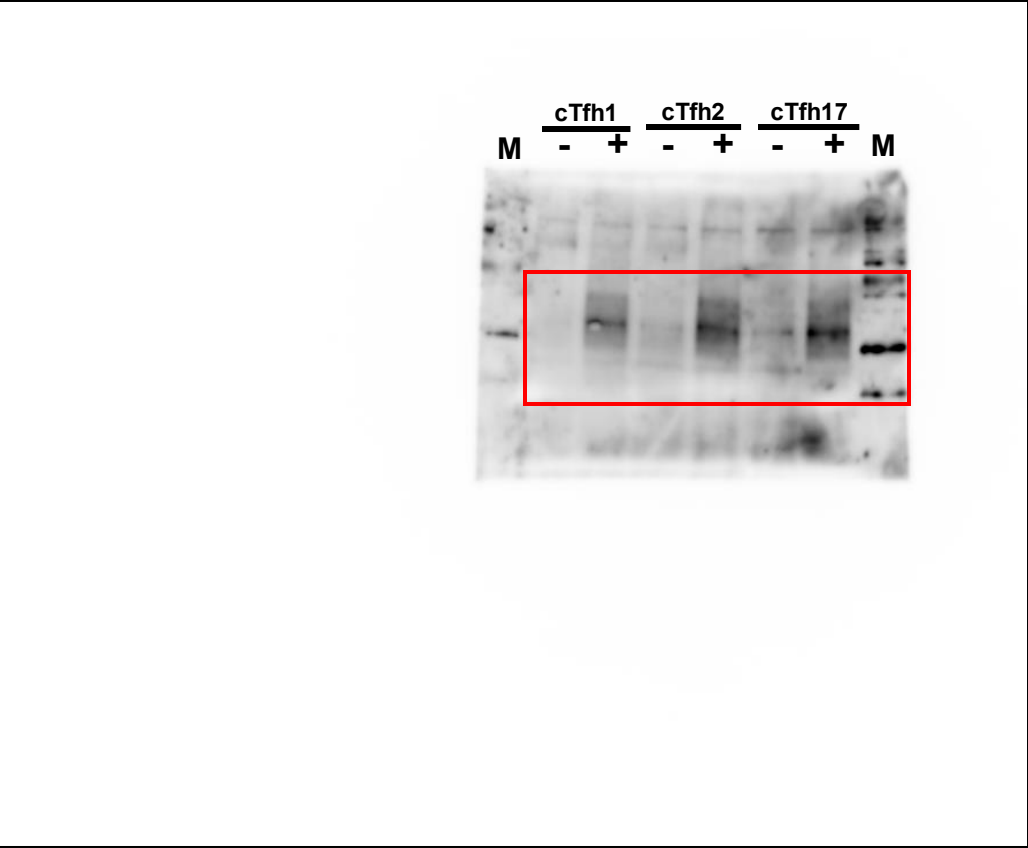

$\beta$ -actin

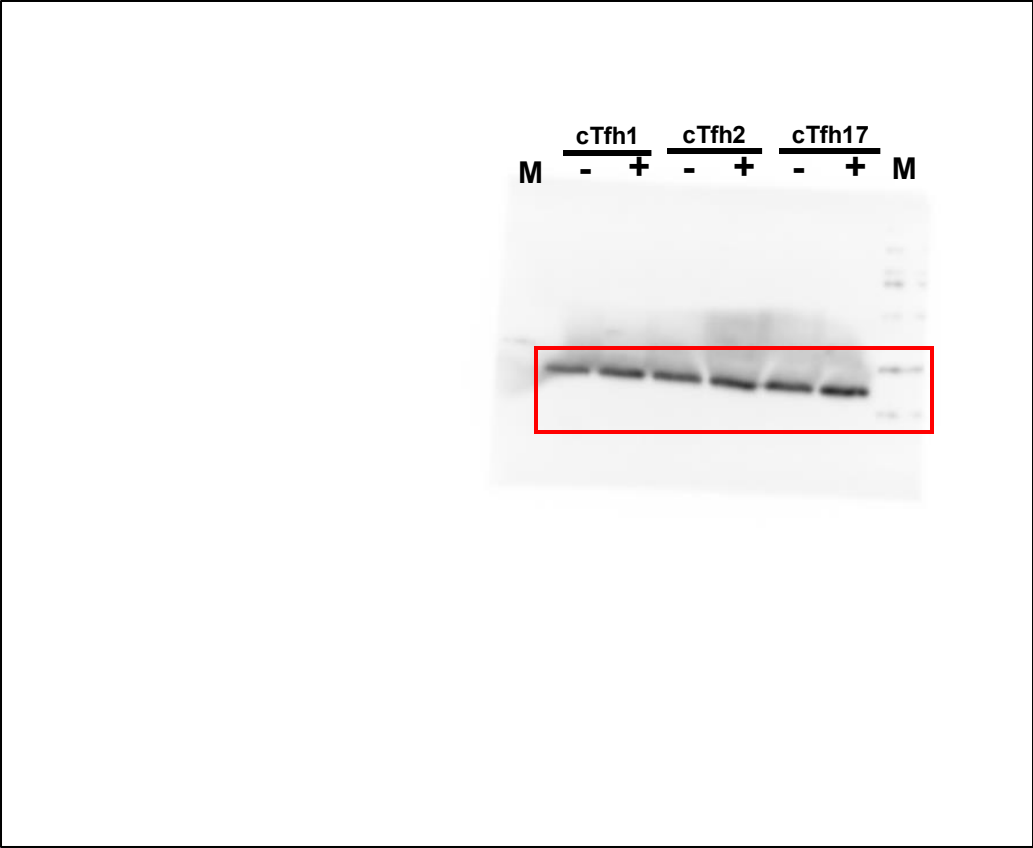

-, unstimulated  
+, stimulated  
M, marker  
anti-GLUT1 antibody (cat. no.12939, D3J3A, Cell Signaling Technology)  
anti- $\beta$ -actin antibody (cat. No.sc-47778, C4, Santa Cruz Biotechnology)
